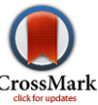

## Correction

# Correction: Sequential Cohort Design Applying Propensity Score Matching to Analyze the Comparative Effectiveness of Atorvastatin and Simvastatin in Preventing Cardiovascular Events

The *PLOS ONE* Staff

There is an error in Table 1. There are several lines out of place in the original table. Please find a corrected version below.

---

**Citation:** The *PLOS ONE* Staff (2014) Correction: Sequential Cohort Design Applying Propensity Score Matching to Analyze the Comparative Effectiveness of Atorvastatin and Simvastatin in Preventing Cardiovascular Events. *PLoS ONE* 9(7): e101633. doi:10.1371/journal.pone.0101633

**Published:** July 31, 2014

**Copyright:** © 2014 The *PLOS ONE* Staff. This is an open-access article distributed under the terms of the Creative Commons Attribution License, which permits unrestricted use, distribution, and reproduction in any medium, provided the original author and source are credited.

**Table 1.** Characteristics of the initiators of simvastatin and atorvastatin therapy between January 1998 and June 2006 in Finland. The study population restricted by the strength of the initiating drug and by the start of the follow-up at 270 days since the initiation is presented without and with the sequential matching by propensity score.

|                                                                        | Initiators without matching     |       |         |                                  |       |         | Sequentially PS matched         |       |         |                                  |       |         |
|------------------------------------------------------------------------|---------------------------------|-------|---------|----------------------------------|-------|---------|---------------------------------|-------|---------|----------------------------------|-------|---------|
|                                                                        | Simvastatin 20 mg<br>(n=73 868) |       |         | Atorvastatin 10 mg<br>(n=96 995) |       |         | Simvastatin 20 mg<br>(n=54 220) |       |         | Atorvastatin 10 mg<br>(n=54 220) |       |         |
|                                                                        | n                               | (%)   | P value | n                                | (%)   | P value | n                               | (%)   | P value | n                                | (%)   | P value |
| Female                                                                 | 36 612                          | -49.6 |         | 50 107                           | -51.7 | <0.001  | 27 453                          | -50.6 |         | 27 449                           | -50.6 | *       |
| Age, mean (SD)                                                         | 60.9                            | -8    |         | 60.4                             | -8    | <0.001  | 60.7                            | -8    |         | 60.7                             | -8    | *       |
| <b>Age category</b>                                                    |                                 |       | <0.001  |                                  |       | <0.001  |                                 |       | <0.001  |                                  |       | *       |
| 45–55 years                                                            | 21 200                          | -28.7 |         | 30 431                           | -31.4 |         | 15 992                          | -29.5 |         | 15 868                           | -29.3 |         |
| 56–65 years                                                            | 29 252                          | -39.6 |         | 37 674                           | -38.8 |         | 21 400                          | -39.5 |         | 21 338                           | -39.4 |         |
| 66–75 years                                                            | 23 416                          | -31.7 |         | 28 890                           | -29.8 |         | 16 828                          | -31   |         | 17 014                           | -31.4 |         |
| <b>Number of hospital days during 365 days prior to the initiation</b> |                                 |       | <0.001  |                                  |       | <0.001  |                                 |       | <0.001  |                                  |       | *       |
| 0                                                                      | 51 583                          | -69.8 |         | 73 396                           | -75.7 |         | 39 233                          | -72.4 |         | 39 265                           | -72.4 |         |
| 1–7                                                                    | 14 202                          | -19.2 |         | 15 908                           | -16.4 |         | 9837                            | -18.1 |         | 9835                             | -18.1 |         |
| 8–30                                                                   | 6790                            | -9.2  |         | 6281                             | -6.5  |         | 4262                            | -7.9  |         | 4204                             | -7.8  |         |
| 31–365                                                                 | 1293                            | -1.8  |         | 1410                             | -1.5  |         | 888                             | -1.6  |         | 916                              | -1.7  |         |
| <b>Comorbidities</b>                                                   |                                 |       |         |                                  |       |         |                                 |       |         |                                  |       |         |
| <i>CVD, PTCA or CAPG in relation to the initiation</i>                 |                                 |       | <0.001  |                                  |       | <0.001  |                                 |       | <0.001  |                                  |       | *       |
| None in preceding 7 years                                              | 63 469                          | -85.9 |         | 82 625                           | -91.4 |         | 48 130                          | -88.8 |         | 48 166                           | -88.8 |         |
| Only earlier than 30 days                                              | 3700                            | -5    |         | 4791                             | -4.9  |         | 2846                            | -5.3  |         | 2833                             | -5.2  |         |
| Only during the preceding 30 days                                      | 5743                            | -7.8  |         | 2916                             | -3    |         | 2705                            | -5    |         | 2680                             | -4.9  |         |
| Both prior to and during 30 days                                       | 956                             | -1.3  |         | 663                              | -0.7  |         | 539                             | -1    |         | 541                              | -1    |         |
| <i>Hospitalized during 7 years prior to the initiation</i>             |                                 |       |         |                                  |       |         |                                 |       |         |                                  |       |         |
| Diabetes                                                               | 3589                            | -4.9  |         | 4144                             | -4.3  |         | 2471                            | -4.6  |         | 2493                             | -4.6  | *       |
| Hypertension                                                           | 5269                            | -7.1  |         | 5933                             | -6.1  |         | 3593                            | -6.6  |         | 3620                             | -6.7  | *       |
| Stroke                                                                 | 3692                            | -5    |         | 5755                             | -5.9  |         | 2972                            | -5.5  |         | 2838                             | -5.2  | 0.071   |
| Cardiac insufficiency                                                  | 990                             | -1.3  |         | 814                              | -0.8  |         | 594                             | -1.1  |         | 567                              | -1.1  | *       |
| Atherosclerotic CVD                                                    | 988                             | -1.3  |         | 1195                             | -1.2  |         | 710                             | -1.3  |         | 711                              | -1.3  | *       |
| Atherosclerosis in lower legs                                          | 416                             | -0.6  |         | 507                              | -0.5  |         | 295                             | -0.5  |         | 288                              | -0.5  | *       |
| <i>Hospitalized during 365 days prior to the initiation</i>            |                                 |       |         |                                  |       |         |                                 |       |         |                                  |       |         |
| Atrial fibrillation                                                    | 957                             | -1.3  |         | 986                              | -1    |         | 655                             | -1.2  |         | 614                              | -1.1  | *       |
| Any cancer diagnosis                                                   | 461                             | -0.6  |         | 578                              | -0.6  |         | 316                             | -0.6  |         | 315                              | -0.6  | *       |
| COPD/asthma                                                            | 324                             | -0.4  |         | 291                              | -0.3  |         | 207                             | -0.4  |         | 207                              | -0.4  | *       |
| Renal insufficiency                                                    | 22                              | 0     |         | 50                               | -0.1  |         | 12                              | 0     |         | 21                               | 0     | *       |
| Dementia                                                               | 36                              | -0.1  |         | 35                               | 0     |         | 19                              | 0     |         | 21                               | 0     | *       |
| Psychotic disease                                                      | 180                             | -0.2  |         | 206                              | -0.2  |         | 127                             | -0.2  |         | 123                              | -0.2  | *       |

**Table 1. Cont.**

|                                                                                    | Initiators without matching     |       |         |                                  |       |         | Sequentially PS matched         |       |         |                                  |       |         |
|------------------------------------------------------------------------------------|---------------------------------|-------|---------|----------------------------------|-------|---------|---------------------------------|-------|---------|----------------------------------|-------|---------|
|                                                                                    | Simvastatin 20 mg<br>(n=73 868) |       |         | Atorvastatin 10 mg<br>(n=96 995) |       |         | Simvastatin 20 mg<br>(n=54 220) |       |         | Atorvastatin 10 mg<br>(n=54 220) |       |         |
|                                                                                    | n                               | (%)   | P value | n                                | (%)   | P value | n                               | (%)   | P value | n                                | (%)   | P value |
| Depression                                                                         | 189                             | -0.3  | 0.041   | 202                              | -0.2  | 0.041   | 124                             | -0.2  | 0.041   | 126                              | -0.2  | *       |
| Organ transplantation                                                              | 8                               | 0     | 0.634   | 13                               | 0     | 0.634   | 3                               | 0     | 0.634   | 4                                | 0     | *       |
| <i>Comorbidities based on the Special Reimbursement Register<sup>#</sup></i>       |                                 |       |         |                                  |       |         |                                 |       |         |                                  |       |         |
| Diabetes                                                                           | 8161                            | -11.1 | <0.001  | 10 043                           | -10.4 | <0.001  | 5703                            | -10.5 | <0.001  | 5760                             | -10.6 | *       |
| Hypothyroidism                                                                     | 2494                            | -3.4  | 0.814   | 3295                             | -3.4  | 0.814   | 1866                            | -3.4  | 0.814   | 1857                             | -3.4  | *       |
| Psychotic disorders                                                                | 2015                            | -2.7  | <0.001  | 2319                             | -2.4  | <0.001  | 1345                            | -2.5  | <0.001  | 1350                             | -2.5  | *       |
| Severe psychotic disease                                                           | 147                             | -0.2  | <0.001  | 137                              | -0.1  | <0.001  | 96                              | -0.2  | <0.001  | 97                               | -0.2  | *       |
| Breast cancer                                                                      | 361                             | -1    | 0.15    | 427                              | -0.9  | 0.15    | 256                             | -1    | 0.15    | 257                              | -1    | *       |
| Prostate cancer                                                                    | 364                             | -0.9  | <0.001  | 387                              | -0.9  | <0.001  | 243                             | -0.9  | <0.001  | 242                              | -0.9  | *       |
| Leukemia                                                                           | 227                             | -0.3  | 0.005   | 229                              | -0.2  | 0.005   | 145                             | -0.3  | 0.005   | 140                              | -0.3  | *       |
| Gynecologic cancers                                                                | 42                              | -0.1  | 0.285   | 68                               | -0.1  | 0.285   | 34                              | -0.1  | 0.285   | 27                               | -0.1  | *       |
| Other cancers                                                                      | 85                              | -0.1  | 0.135   | 89                               | -0.1  | 0.135   | 45                              | -0.1  | 0.135   | 48                               | -0.1  | *       |
| Prior organ transplantation                                                        | 69                              | -0.1  | 0.003   | 139                              | -0.1  | 0.003   | 56                              | -0.1  | 0.003   | 52                               | -0.1  | *       |
| Uremia with dialysis                                                               | 40                              | -0.1  | <0.001  | 104                              | -0.1  | <0.001  | 28                              | 0     | <0.001  | 33                               | -0.1  | *       |
| Use of interferon alpha                                                            | 13                              | 0     | 0.766   | 19                               | 0     | 0.766   | 8                               | 0     | 0.766   | 9                                | 0     | *       |
| Cardiac insufficiency                                                              | 2001                            | -2.7  | <0.001  | 2181                             | -2.3  | <0.001  | 1341                            | -2.5  | <0.001  | 1350                             | -2.5  | *       |
| Rheumatic disease                                                                  | 2117                            | -2.9  | <0.001  | 2559                             | -2.6  | <0.001  | 1492                            | -2.8  | <0.001  | 1480                             | -2.7  | *       |
| Asthma                                                                             | 5194                            | -7    | <0.001  | 5867                             | -6.1  | <0.001  | 3576                            | -6.6  | <0.001  | 3592                             | -6.6  | *       |
| Chronic hypertension                                                               | 22 723                          | -30.8 | 0.085   | 30 214                           | -31.1 | 0.085   | 16 776                          | -30.9 | 0.085   | 16 819                           | -31   | *       |
| CAD                                                                                | 10 917                          | -14.9 | <0.001  | 10 434                           | -10.8 | <0.001  | 7049                            | -13   | <0.001  | 7034                             | -13   | *       |
| Dysrhythmia                                                                        | 1707                            | -2.3  | <0.001  | 2037                             | -2.1  | <0.001  | 1231                            | -2.3  | <0.001  | 1223                             | -2.3  | *       |
| Familial dyslipidemia                                                              | 40                              | -0.1  | 0.098   | 36                               | 0     | 0.098   | 26                              | -0.1  | 0.098   | 25                               | -0.1  | *       |
| Dyslipidemia with CAD                                                              | 3692                            | -5    | <0.001  | 2927                             | -3    | <0.001  | 2256                            | -4.2  | <0.001  | 2256                             | -4.2  | *       |
| Clopidogrel use with CAD                                                           | 74                              | -0.1  | <0.001  | 43                               | 0     | <0.001  | 36                              | -0.1  | <0.001  | 36                               | -0.1  | *       |
| Clopidogrel use with other indications                                             | 235                             | -0.3  | <0.001  | 220                              | -0.2  | <0.001  | 146                             | -0.3  | <0.001  | 149                              | -0.3  | *       |
| Use of anti-dementia drugs <sup>§</sup>                                            | 128                             | -0.2  | 0.07    | 206                              | -0.2  | 0.07    | 96                              | -0.2  | 0.07    | 91                               | -0.2  | *       |
| Parkinsonism                                                                       | 241                             | -0.3  | 0.102   | 274                              | -0.3  | 0.102   | 163                             | -0.3  | 0.102   | 145                              | -0.3  | *       |
| Epilepsy                                                                           | 847                             | -1.2  | 0.301   | 1165                             | -1.2  | 0.301   | 621                             | -1.2  | 0.301   | 614                              | -1.1  | *       |
| <b>Medication</b>                                                                  |                                 |       |         |                                  |       |         |                                 |       |         |                                  |       |         |
| Number of different preparations purchased during 4 months prior to the initiation |                                 |       |         |                                  |       |         |                                 |       |         |                                  |       |         |
| 1-5                                                                                | 9571                            | -13   | <0.001  | 7626                             | -7.9  | <0.001  | 5675                            | -10.5 | <0.001  | 5749                             | -10.6 | *       |

**Table 1. Cont.**

|                                                                      | Initiators without matching       |       |                                    |       | Sequentially PS matched           |       |                                    |       |   |
|----------------------------------------------------------------------|-----------------------------------|-------|------------------------------------|-------|-----------------------------------|-------|------------------------------------|-------|---|
|                                                                      | Simvastatin 20 mg<br>(n = 73 868) |       | Atorvastatin 10 mg<br>(n = 96 995) |       | Simvastatin 20 mg<br>(n = 54 220) |       | Atorvastatin 10 mg<br>(n = 54 220) |       |   |
|                                                                      | n                                 | (%)   | n                                  | %     | n                                 | (%)   | n                                  | %     |   |
| 6–10                                                                 | 20 434                            | –27.7 | 21 861                             | –22.5 | 14 015                            | –25.9 | 14 034                             | –25.9 |   |
| 11–15                                                                | 17 596                            | –23.8 | 22 806                             | –23.5 | 13 108                            | –24.2 | 13 087                             | –24.1 |   |
| 16–20                                                                | 11 339                            | –15.4 | 17 041                             | –17.6 | 8828                              | –16.3 | 8884                               | –16.4 |   |
| >20                                                                  | 14 928                            | –20.2 | 27 661                             | –28.5 | 12 594                            | –23.2 | 12 466                             | –23   |   |
| <i>At least one purchase during 365 days prior to the initiation</i> |                                   |       |                                    |       |                                   |       |                                    |       |   |
| Diabetes drugs                                                       | 11 500                            | –15.6 | 14 284                             | –14.7 | 8026                              | –14.8 | 8027                               | –14.8 | * |
| Antithrombotic agents                                                | 8608                              | –11.7 | 9850                               | –10.2 | 5887                              | –10.9 | 5814                               | –10.7 | * |
| Organic nitrates and cardiac glycosides                              | 15 772                            | –21.4 | 15 877                             | –16.4 | 10 385                            | –19.2 | 10 309                             | –19   | * |
| Centrally acting hypertension drugs                                  | 644                               | –0.9  | 746                                | –0.8  | 437                               | –0.8  | 441                                | –0.8  | * |
| Diuretics                                                            | 11 203                            | –15.2 | 14 231                             | –14.7 | 8066                              | –14.9 | 8050                               | –14.9 | * |
| Peripheral vasodilators                                              | 64                                | –0.1  | 124                                | –0.1  | 49                                | –0.1  | 52                                 | –0.1  | * |
| Beta-blocking agents                                                 | 31 409                            | –42.5 | 36 108                             | –37.2 | 21 906                            | –40.4 | 21 915                             | –40.4 | * |
| Selective calcium channels blockers                                  | 12 678                            | –17.2 | 16 133                             | –16.6 | 9203                              | –17   | 9270                               | –17.1 | * |
| ACEI or ARB                                                          | 26 292                            | –36   | 30 162                             | –31.1 | 18 166                            | –33.5 | 18 176                             | –33.5 | * |
| Non-statin lipid-lowering drug                                       | 544                               | –0.7  | 1573                               | –1.6  | 439                               | –0.8  | 472                                | –0.9  | * |
| Drugs for obstructive airway diseases                                | 7680                              | –10.4 | 9293                               | –9.6  | 5361                              | –9.9  | 5387                               | –9.9  | * |
| Anti-dementia drugs                                                  | 79                                | –0.1  | 111                                | –0.1  | 59                                | –0.1  | 54                                 | –0.1  | * |
| Antidepressants                                                      | 7086                              | –9.6  | 9424                               | –9.7  | 5232                              | –9.7  | 5172                               | –9.5  | * |
| Antipsychotics                                                       | 2088                              | –2.8  | 2555                               | –2.6  | 1430                              | –2.6  | 1437                               | –2.7  | * |
| Antineoplastic agents                                                | 342                               | –0.5  | 521                                | –0.6  | 265                               | –0.5  | 256                                | –0.5  | * |

CVD, cardiovascular disease; PTCA, percutaneous transluminal coronary angioplasty; CAPG, coronary artery bypass graft surgery; COPD, chronic obstructive pulmonary disease; CAD, coronary artery disease; ACEI, angiotensin-converting-enzyme inhibitor; ARB, angiotensin receptor blocker.

#Eligibility to special reimbursement any time prior to the initiation.

‡Use of donepezil, galantamine, memantine, or rivastigmine.

P values are based on Chi<sup>2</sup> test for categorical variables and Student's t test for continuous variables.

\*>0.1.

doi:10.1371/journal.pone.0090325.t001

## Reference

1. Helin-Salmivaara A, Lavikainen P, Aarnio E, Huupponen R, Korhonen MJ (2014) Sequential Cohort Design Applying Propensity Score Matching to Analyze the Comparative Effectiveness of Atorvastatin and Simvastatin in Preventing Cardiovascular Events. *PLoS ONE* 9(3): e90325. doi:10.1371/journal.pone.0090325.
